# Supplementary material for: Different MAPT haplotypes influence expression of total MAPT in postmortem brain tissue
Source: PubMed Central journal article supplement (PMC10008602; doi:10.1186/s40478-023-01534-9), 2023-03-11

Fusiform gyrus

Cerebellum (control region)

H1/H1 *MAPT*

H2/H2 *MAPT*

H1/H1 *MAPT*

H2/H2 *MAPT*

Control

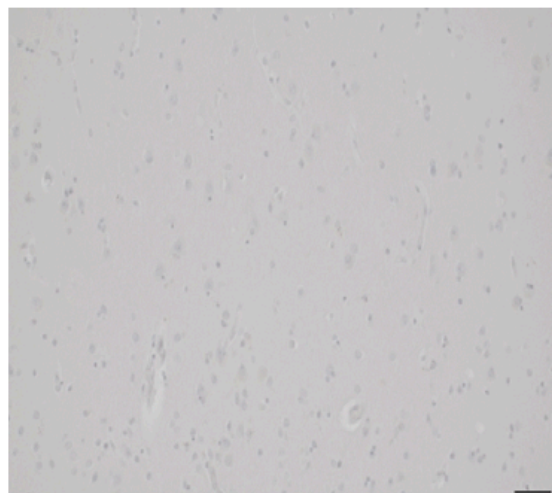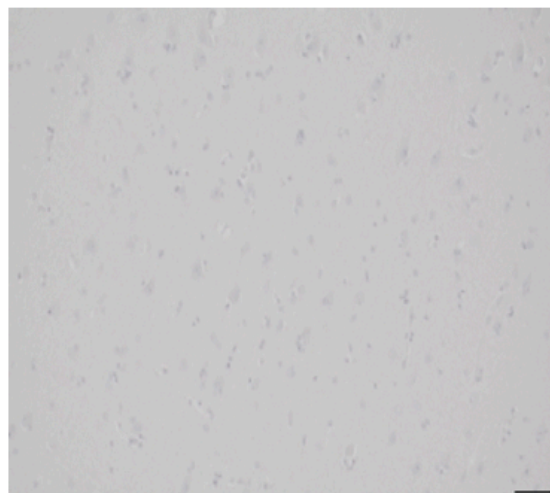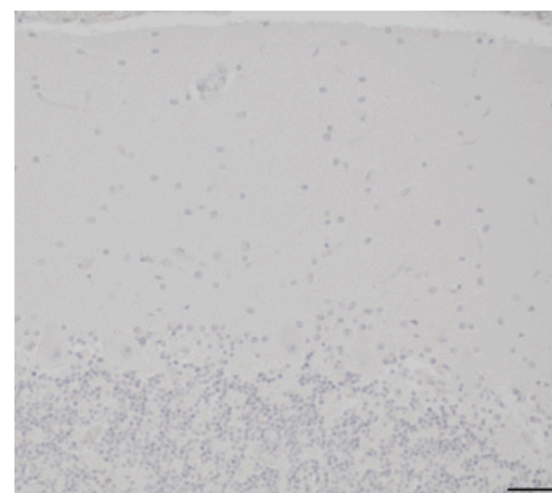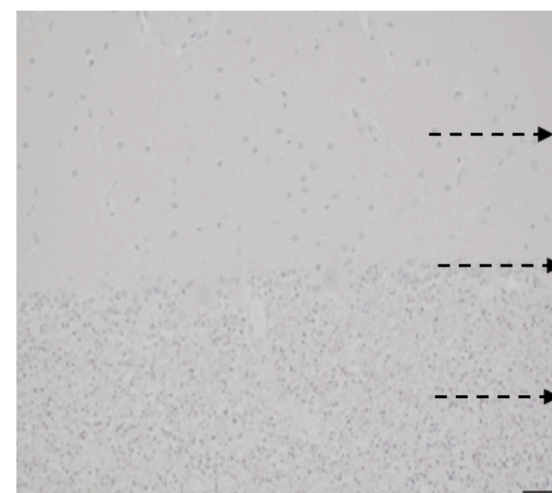

*m*

*p*

*g*

PD

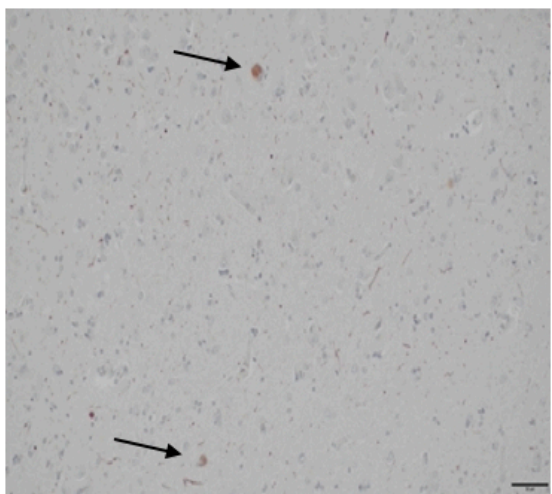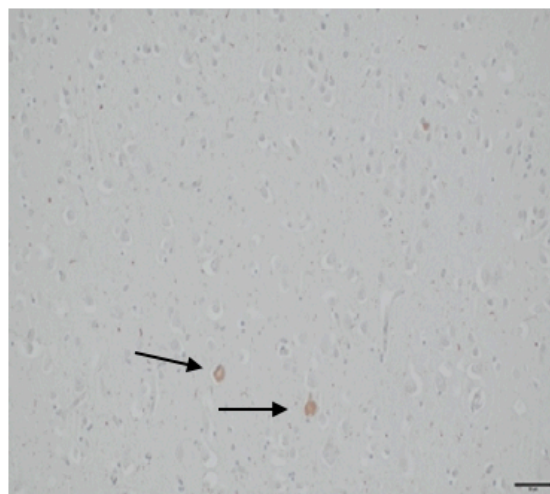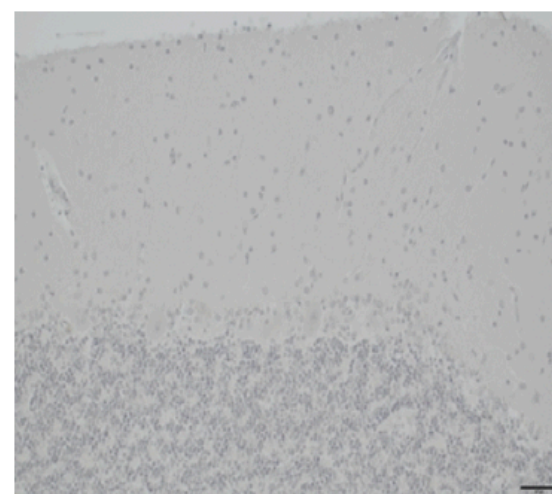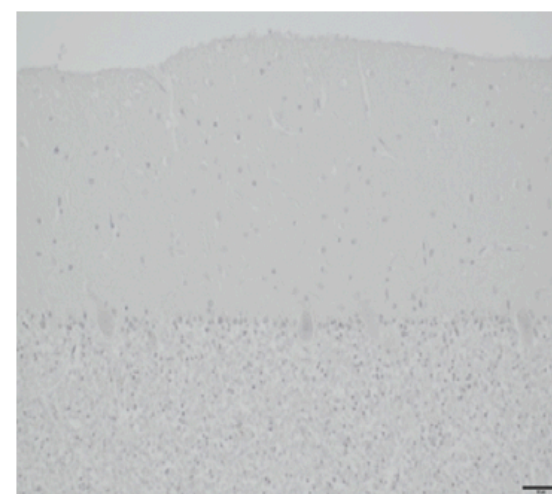

**A**

Soluble  
Tau

75 kDa

50 kDa

37 kDa

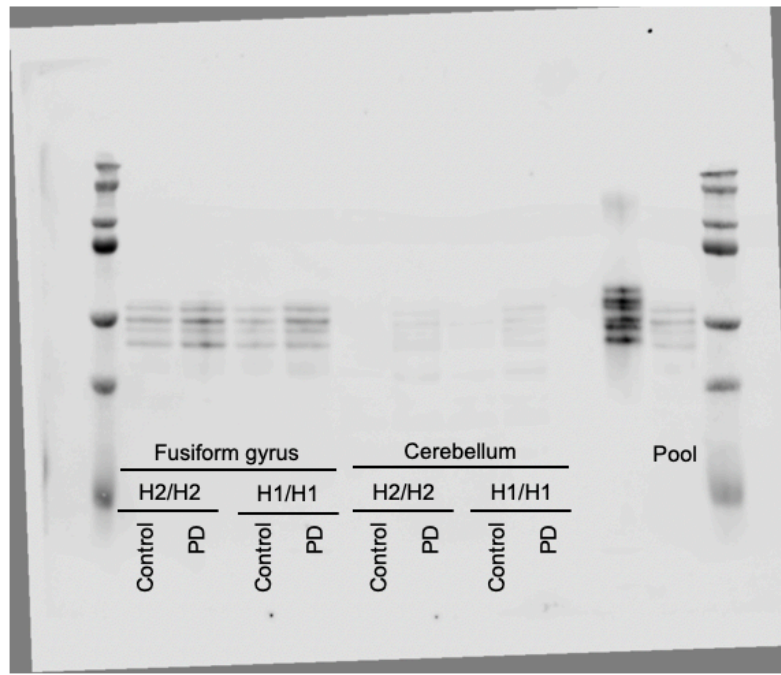

**B**

Soluble  
Tau

75 kDa

50 kDa

37 kDa

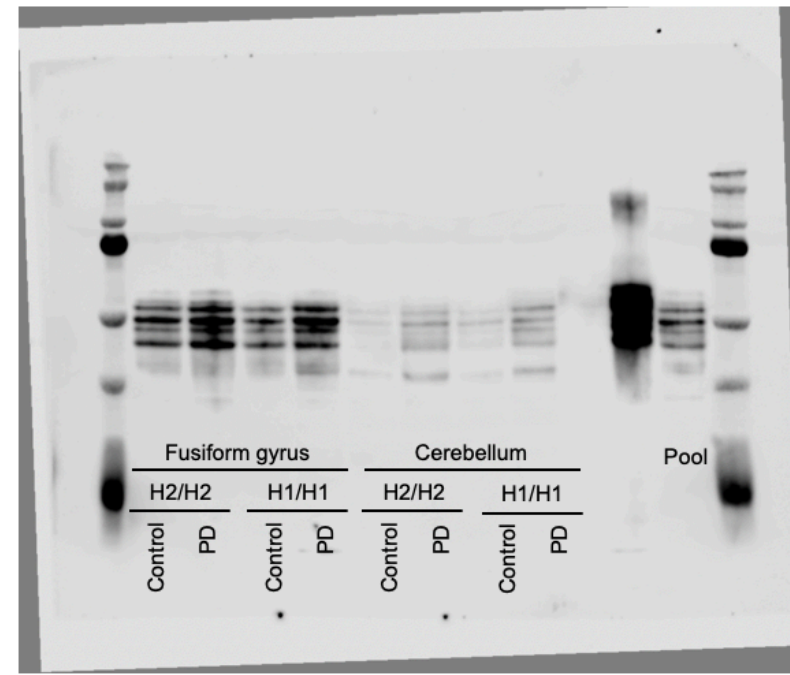

**C**

GAPDH

75 kDa

50 kDa

37 kDa

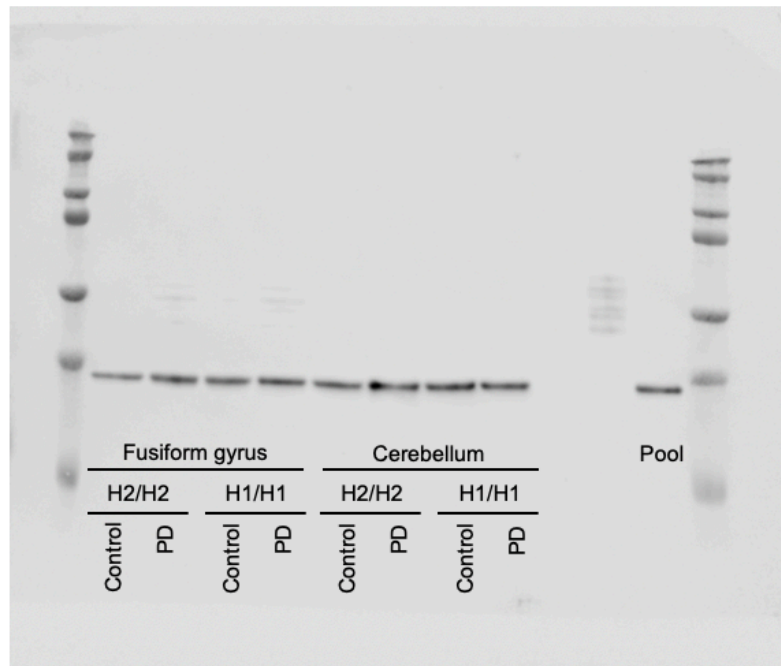

**A**

Soluble  
 $\alpha$ -Syn

15 kDa

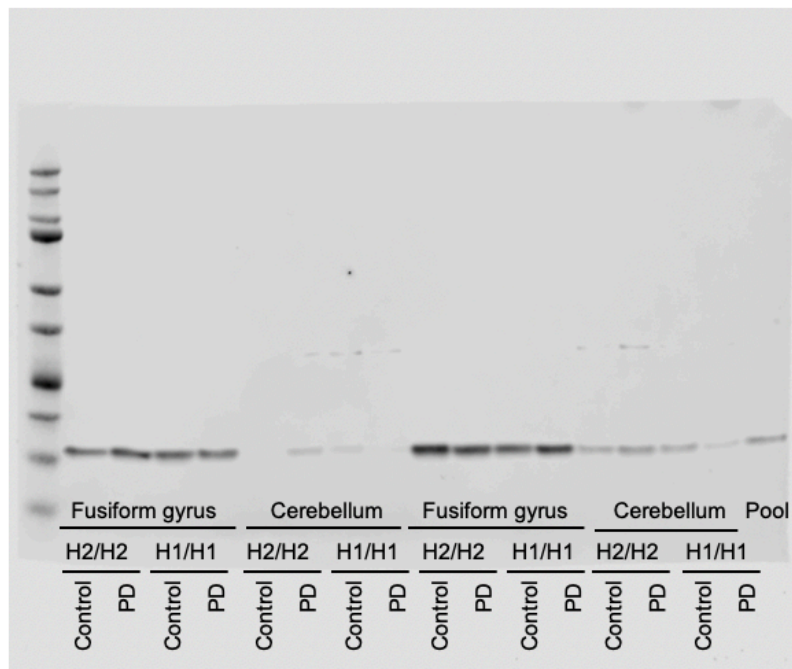

**B**

Soluble  
 $\alpha$ -Syn

15 kDa

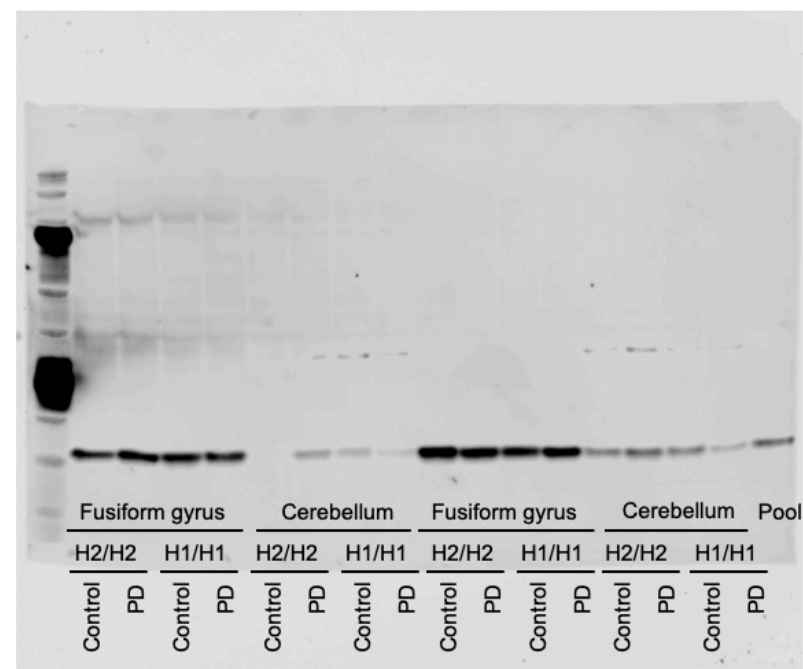

**C**

GAPDH

37 kDa

15 kDa

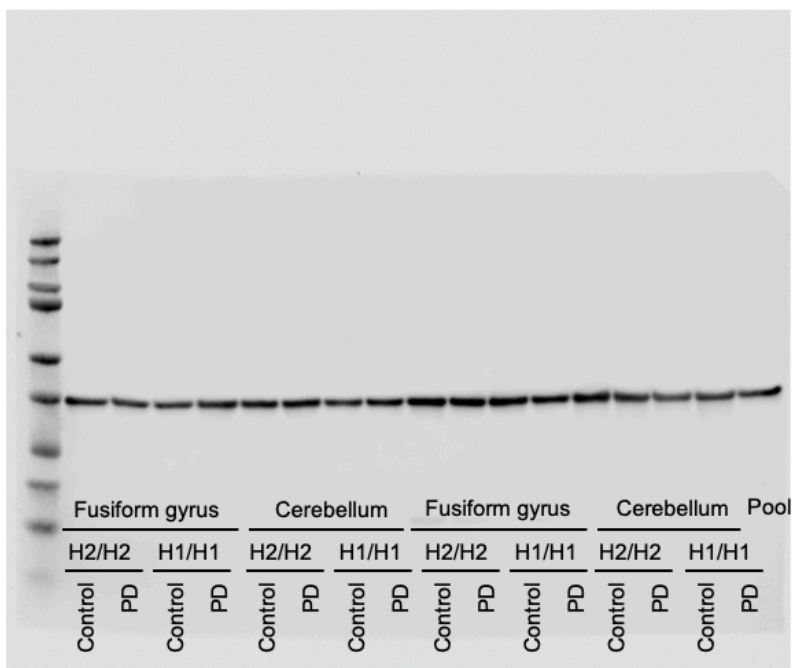





**A**

Insoluble  
Tau

75 kDa  
50 kDa  
37 kDa

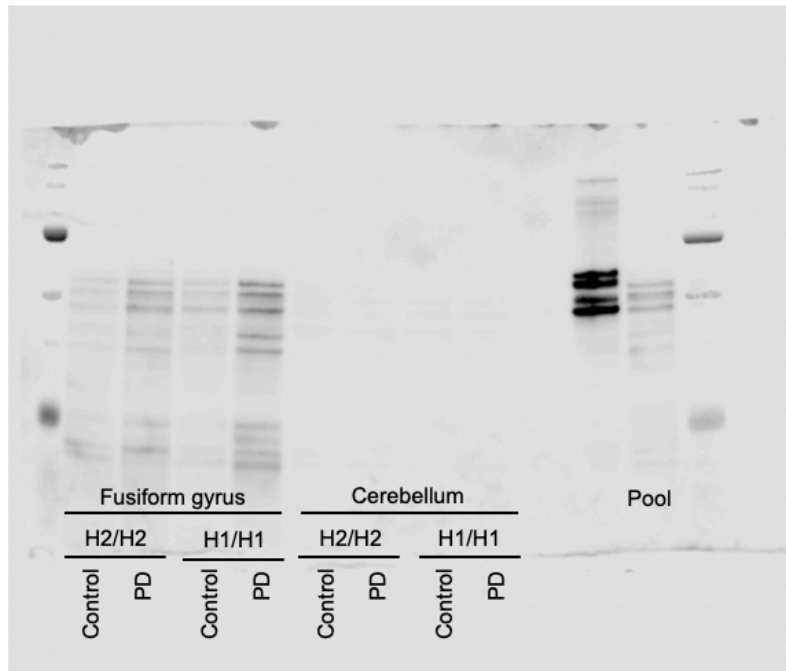

**B**

Insoluble  
Tau

75 kDa  
50 kDa  
37 kDa

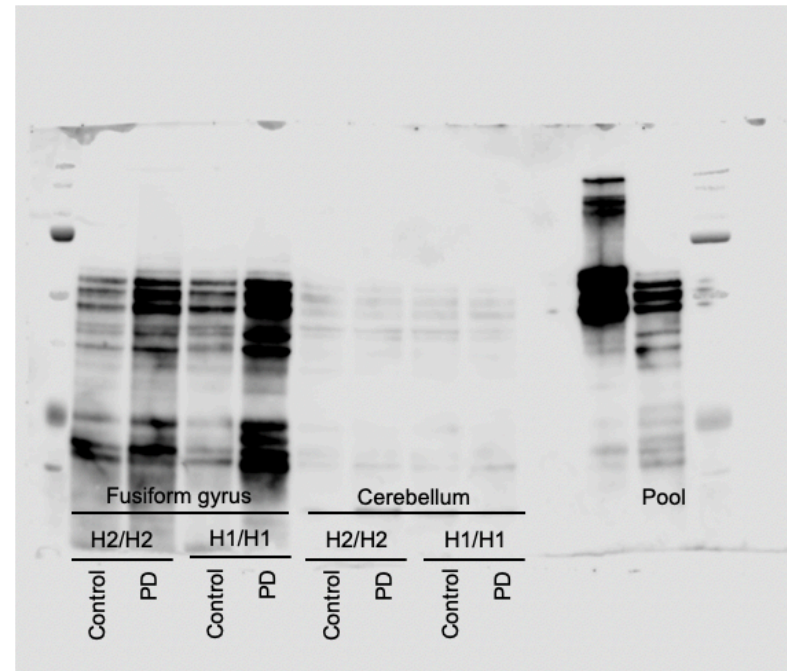

**C**

Total  
Protein  
Stain

75 kDa  
50 kDa  
37 kDa

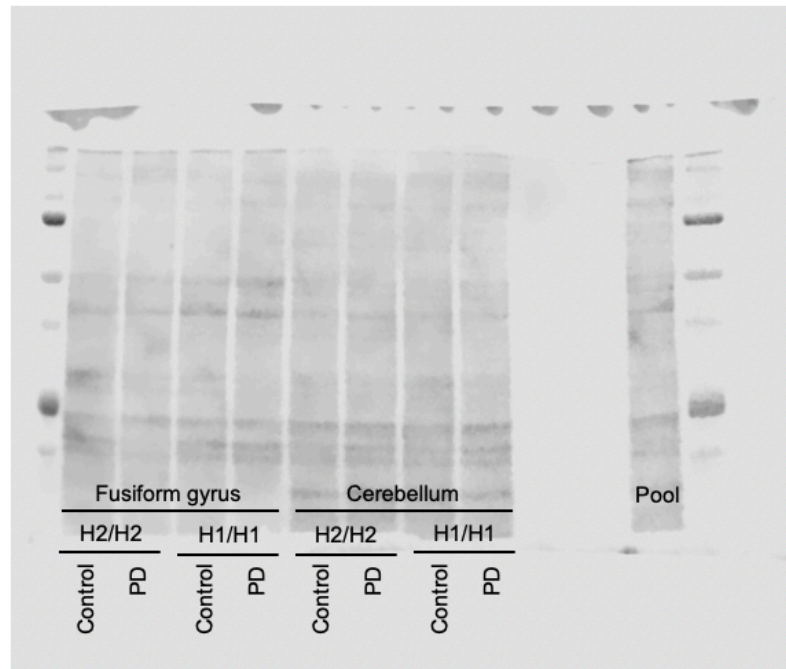

Supplement: 40478_2023_1534_MOESM2_ESM.pdf [file 40478_2023_1534_MOESM2_ESM.pdf]
